# Supplementary material for: The Presence of Myosteatosis Is Associated with Age, Severity of Liver Disease and Poor Outcome and May Represent a Prodromal Phase of Sarcopenia in Patients with Liver Cirrhosis
Source: MDPI journal article supplement (doi:10.3390/jcm12093332), 2023-05-07
Supplement: s1 [file s1]

**Table S1.** Comparison of demographics and clinical characteristics among 4 groups according to the extent of muscle abnormalities (patients 194)

|                                                                                    | <b>Group A</b><br><b>Neither MS nor</b><br><b>sarcopenia</b><br>(N=49) | <b>Group B</b><br><b>MS alone</b><br>(N=60) | <b>Group C</b><br><b>MS combined</b><br><b>by low</b><br><b>handgrip*</b><br>(N=34) | <b>Group D</b><br><b>MS combined</b><br><b>by low</b><br><b>handgrip &amp;</b><br><b>low SMI*</b><br>(N=51) | <i>P</i> <sub>1</sub> | <i>P</i> <sub>2</sub> | <i>P</i> <sub>3</sub> | <i>P</i> <sub>4</sub> | <i>P</i> <sub>5</sub> | <i>P</i> <sub>6</sub> | <i>P</i> |
|------------------------------------------------------------------------------------|------------------------------------------------------------------------|---------------------------------------------|-------------------------------------------------------------------------------------|-------------------------------------------------------------------------------------------------------------|-----------------------|-----------------------|-----------------------|-----------------------|-----------------------|-----------------------|----------|
| <b>Age</b>                                                                         | 56.0<br>(50.0-63.5)                                                    | 57.5<br>(51.25-66.00)                       | 62.5<br>(57.0-69.5)                                                                 | 67.00<br>(59.00-72.50)                                                                                      | 0.176                 | 0.009                 | <0.001                | 0.111                 | 0.003                 | 0.121                 | < 0.001  |
| <b>Gender (Male, N, %)</b>                                                         | 37 (75.5)                                                              | 40 (66.7)                                   | 17 (50.0)                                                                           | 35 (68.6)                                                                                                   | 0.313                 | 0.017                 | 0.443                 | 0.112                 | 0.826                 | 0.084                 | 0.109    |
| <b>Dry BMI</b>                                                                     | 26.67 (25.61-<br>29.98)                                                | 24.4 (22.04-<br>28.83)                      | 28.15 (24.08-<br>34.05)                                                             | 23.28 (20.80-<br>26.41)                                                                                     | 0.004                 | 0.520                 | <0.001                | 0.018                 | 0.020                 | <0.001                | <0.001   |
| <b>Aetiology (N, %):</b><br>- <b>Alcoholic</b><br>- <b>Viral</b><br>- <b>Other</b> | 20 (40.8)<br>17 (34.7)<br>12 (24.5)                                    | 24 (40)<br>17 (28.3)<br>19 (31.7)           | 17 (50.0)<br>6 (17.6)<br>11 (32.4)                                                  | 24 (47.1)<br>4 (7.8)<br>23 (45.1)                                                                           | 0.656                 | 0.231                 | 0.003                 | 0.469                 | 0.021                 | 0.282                 | 0.038    |
| <b>Decompensated</b><br><b>cirrhosis (N, %)</b>                                    | 16 (32.7)                                                              | 35 (58.3)                                   | 25 (73.5)                                                                           | 41 (80.4)                                                                                                   | 0.008                 | < 0.001               | < 0.001               | 0.141                 | 0.013                 | 0.457                 | < 0.001  |
| <b>MELD score</b>                                                                  | 9.0<br>(7.0-10.75)                                                     | 11.0<br>(7.00-14.0)                         | 10.0<br>(7.00-15.75)                                                                | 15.0<br>(11.50-21.50)                                                                                       | 0.241                 | 0.184                 | < 0.001               | 0.743                 | <<br>0.001            | 0.017                 | < 0.001  |
| <b>Child-Pugh score</b>                                                            | 5.0<br>(5.0-7.0)                                                       | 7.0<br>(5.0-9.0)                            | 7.0<br>(6.0-8.0)                                                                    | 9.0<br>(7.0-10.0)                                                                                           | 0.01                  | 0.002                 | < 0.001               | 0.453                 | 0.002                 | 0.043                 | < 0.001  |
| <b>Handgrip strength</b>                                                           | 32. 0<br>(24.50-40.0)                                                  | 34.00<br>(30.0-38.00)                       | 18.50<br>(15.50-27.25)                                                              | 20.0<br>(14.0-25.0)                                                                                         | 0.240                 | < 0.001               | < 0.001               | <<br>0.001            | <<br>0.001            | 0.689                 | < 0.001  |
| <b>SMI</b>                                                                         | 54.20<br>(49.72-57.48)                                                 | 46.84<br>(42.25-53.03)                      | 51.03<br>(44.38-57.82)                                                              | 40.50<br>(31.57-45.54)                                                                                      | <<br>0.001            | 0.189                 | < 0.001               | 0.057                 | <<br>0.001            | < 0.001               | < 0.001  |
| <b>SPPB</b>                                                                        | 12.0<br>(10.0-12.0)                                                    | 11.0<br>(10.0-12.0)                         | 9.0<br>(6.75-11.0)                                                                  | 8.00<br>(3.75-10.00)                                                                                        | 0.416                 | < 0.001               | < 0.001               | <<br>0.001            | <<br>0.001            | 0.036                 | < 0.001  |
| <b>VATI</b>                                                                        | 45.38<br>(27.97-62.28)                                                 | 50.60<br>(28.85-80.08)                      | 54.78<br>(35.72-96.31)                                                              | 47.43<br>(26.16-63.81)                                                                                      | 0.171                 | 0.079                 | 0.893                 | 0.504                 | 0.210                 | 0.101                 | 0.194    |
| <b>SATI</b>                                                                        | 66.25<br>(48.62-92.32)                                                 | 58.10<br>(36.35-87.65)                      | 87.27<br>(48.62-124.09)                                                             | 44.36<br>(25.90-66.70)                                                                                      | 0.155                 | 0.151                 | < 0.001               | 0.008                 | 0.008                 | < 0.001               | < 0.001  |
| <b>Mean HU</b><br><b>attenuation</b>                                               | 37.34<br>(33.94-40.35)                                                 | 30.66<br>(26.75-35.65)                      | 27.98<br>(23.30-31.15)                                                              | 27.83<br>(22.50-32.35)                                                                                      | <<br>0.001            | < 0.001               | < 0.001               | 0.026                 | 0.026                 | 0.950                 | < 0.001  |

\*Groups C and D had sarcopenia according to the updated EWGSOP-2 criteria (<sup>2</sup>); HU, Hounsfield Units; MS myosteatosis; SATI, subcutaneous adipose tissue index; SMI, skeletal mass index; SPPB, short physical performance battery test; VATI, visceral adipose tissue index

$P_1$ : corresponds to the comparison between groups A B;  $P_2$  corresponds to the comparison between groups A and C;  $P_3$  corresponds to the comparison between groups A and D;  $P_4$  corresponds to the comparison between groups B and C;  $P_5$  corresponds to the comparison between groups B and D;  $P_6$  corresponds to the comparison between groups C and D

Mann-Whitney ( $P_1, P_2, P_3, P_4, P_5, P_6$ ) and Kruskal Wallis tests ( $P$ ) were used for continuous variables and for  $\chi^2$  test was used for categorical variables
